# Supplementary material for: Development of historical maps of land use-land cover, crop type, nutrients, and irrigation across CONUS (1938–2020) at different spatial resolutions
Source: Copernicus journal article supplement (doi:10.5194/essd-2025-445), 2025-09-05
Supplement: Supplementary file 1 [file essd-2025-445-supplement.pdf]

## Supplement.

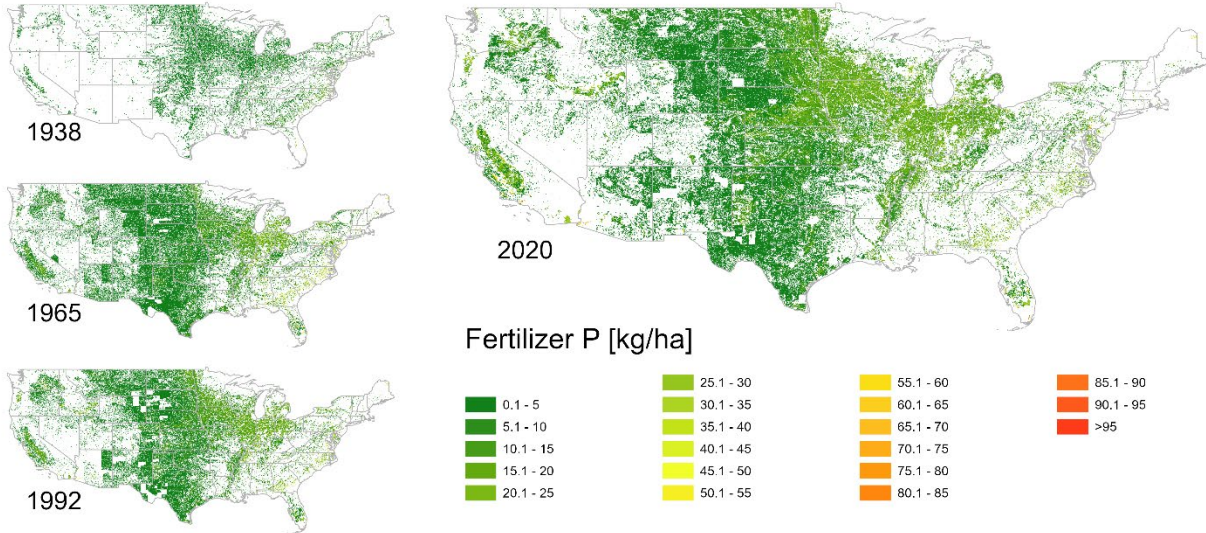

Figure S1: Fertilizer P mass at 48 arc-seconds resolution for 1938, 1965, 1992, and 2020 estimated by this study (HLNID).

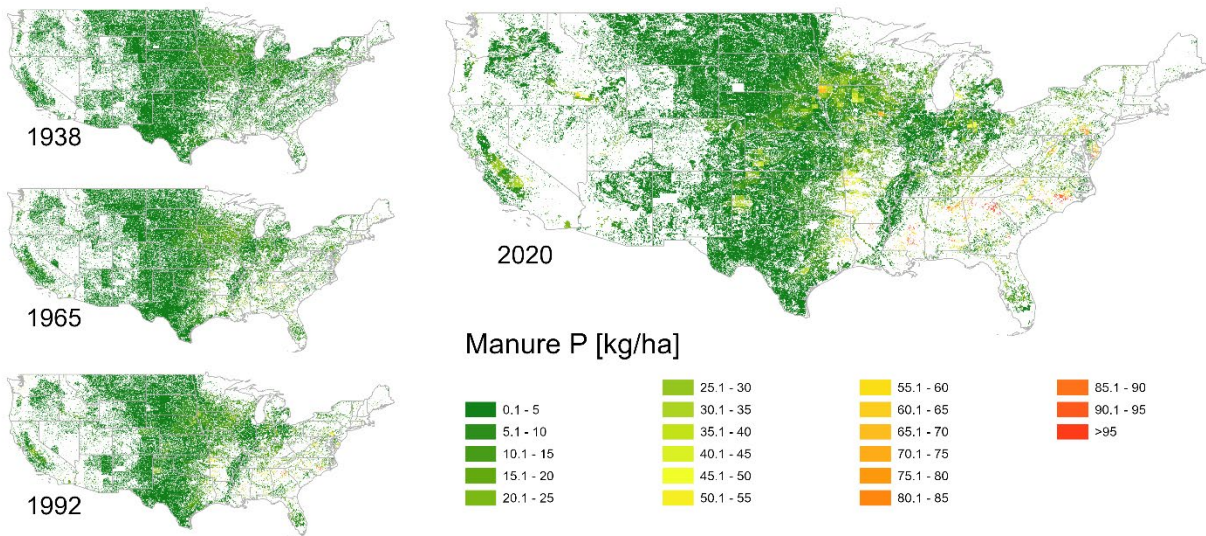

Figure S2: Manure P mass at 48 arc-seconds resolution for 1938, 1965, 1992, and 2020 estimated by this study (HLNID).

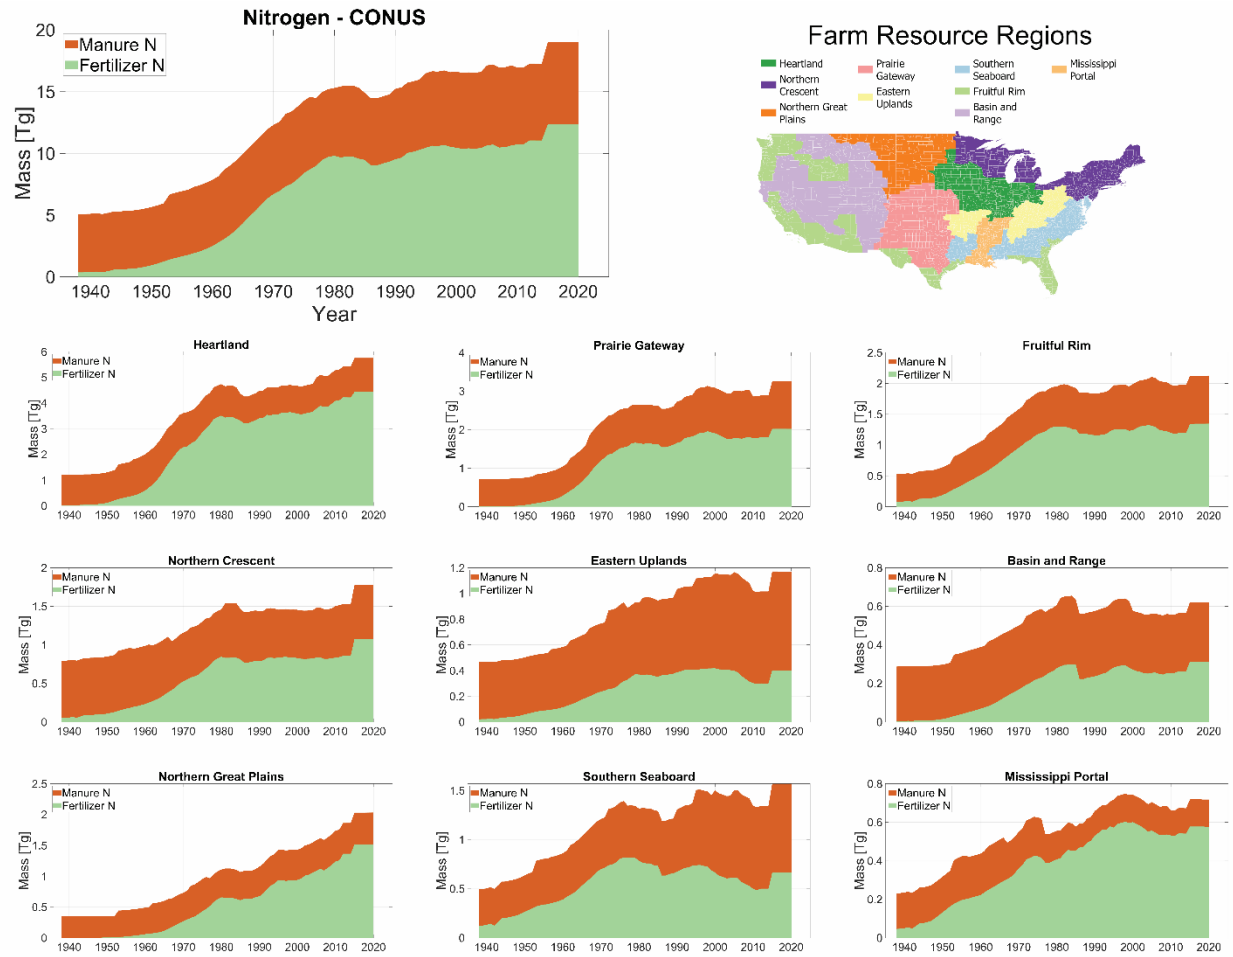

**Figure S3: Change in CONUS nitrogen masses (manure and fertilizer) from 1938-2020 and for the 9 Farm Resource Regions.**
